# Supplementary material for: Naphthalimide based methacrylated photoinitiators in radical and cationic photopolymerization under visible light
Source: Royal Society of Chemistry journal article supplement (doi:10.1039/c3py00766a), 2013-01-01
Supplement: c3py00766a.pdf [file c3py00766a.pdf]

Supporting Information:

## Naphthalimide Based Methacrylated Photoinitiators in Radical and Cationic Photopolymerization under Visible Light

Pu Xiao, Frédéric Dumur, Michel Frigoli, Mohamad-Ali Tehfe, Bernadette Graff, Jean Pierre Fouassier, Didier Gimes and Jacques Lalevée

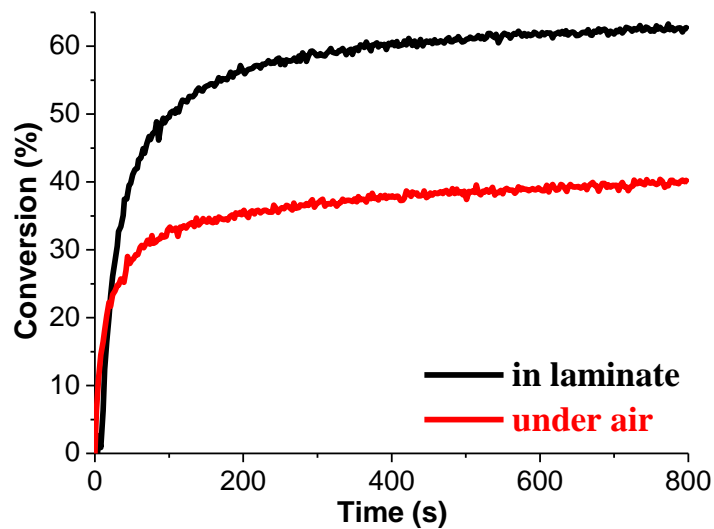

**Figure S1.** Photopolymerization profiles of Ebecryl 605 (from Cytec) in the presence of MANA\_1/Iod/NVK (1%/2%/3%, w/w/w) in laminate and under air upon the laser diode at 457 nm exposure.
